# Supplementary material for: A rapid ion chromatography column-switching method for online sample pretreatment and determination ofl-carnitine, choline and mineral ions in milk and powdered infant formula
Source: Royal Society of Chemistry journal article supplement (doi:10.1039/c6ra25711a), 2017-01-01
Supplement: c6ra25711a1.pdf [file c6ra25711a1.pdf]

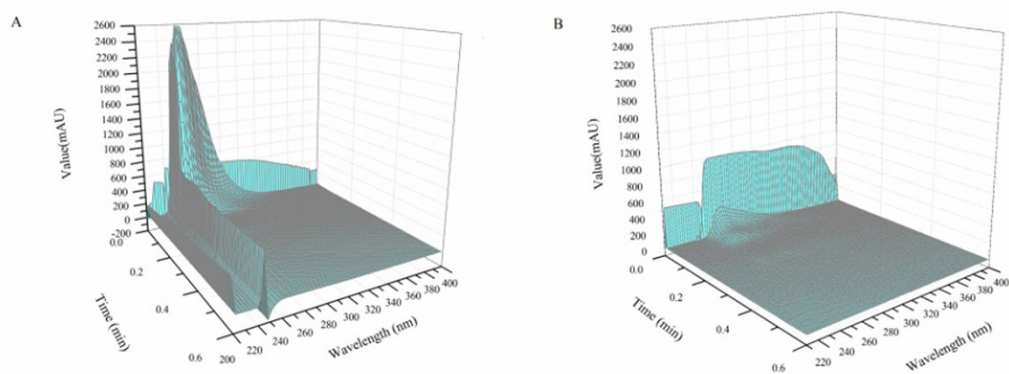

**Fig. S1** Three dimensional diagram of the real sample, analysis of milk sample by direct injection at the flow rate of  $1 \text{ mL min}^{-1}$  (A),  $1 \text{ mL min}^{-1}$  (B).

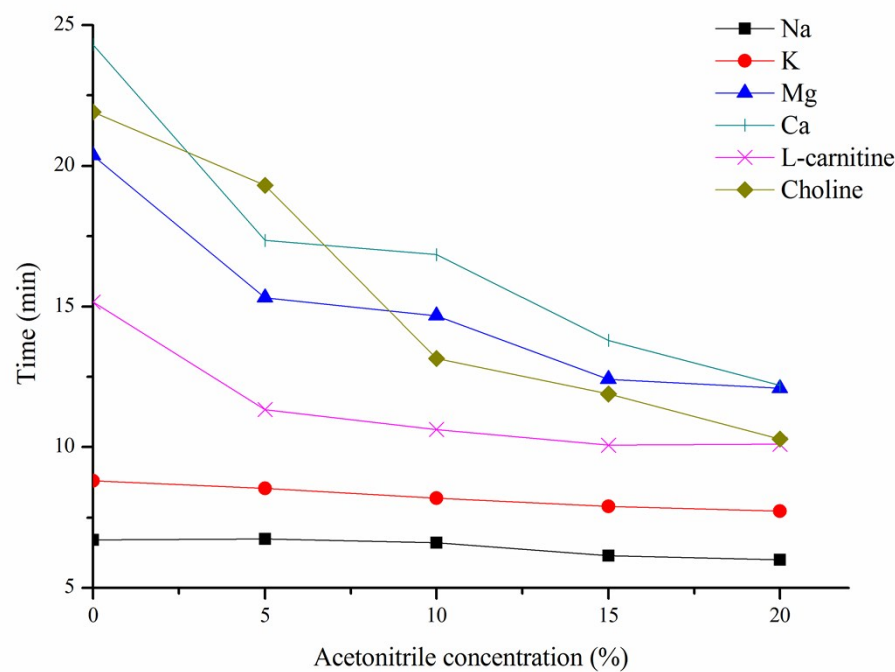

**Fig. S2** The ratio of acetonitrile on the separation performance of analytical column
